# Supplementary material for: Morfología glaciar en la vertiente meridional de Sierra Nevada (Área Veleta-Mulhacén)
Source: HighWire-hosted journal article supplement (doi:10.1136/jitc-2021-004329), 1987-01-01

**A** primary tumor Pt #14: >50% HLA-ABC loss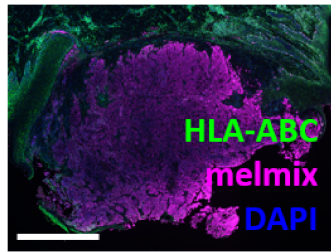**B** metastatic lesion Pt #14: >50% HLA-ABC loss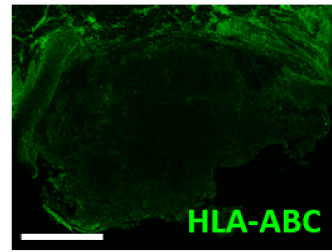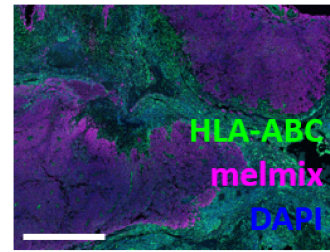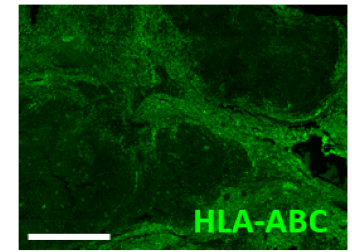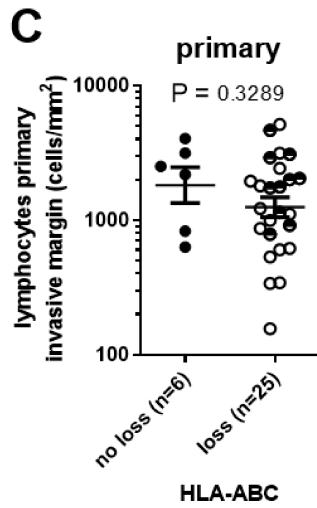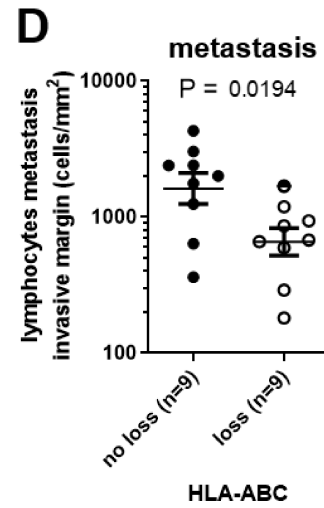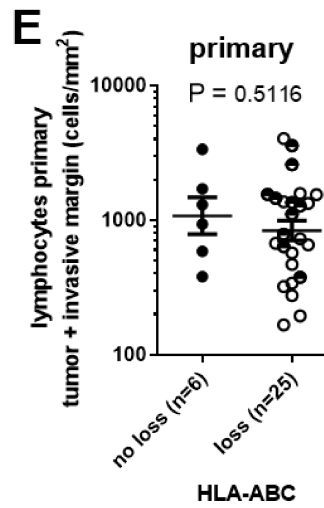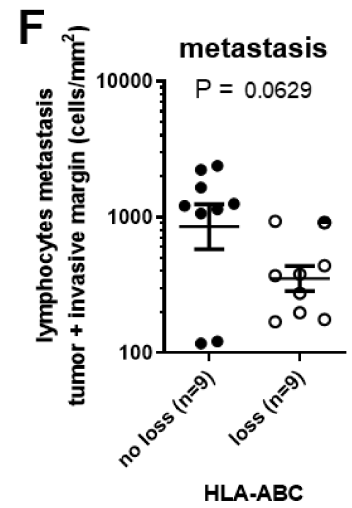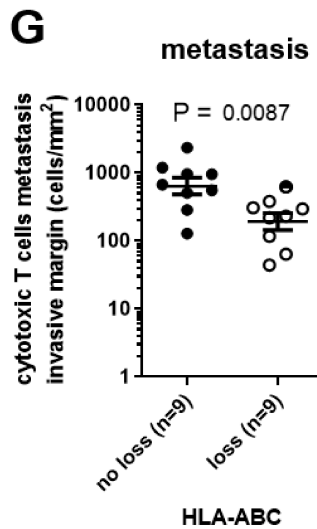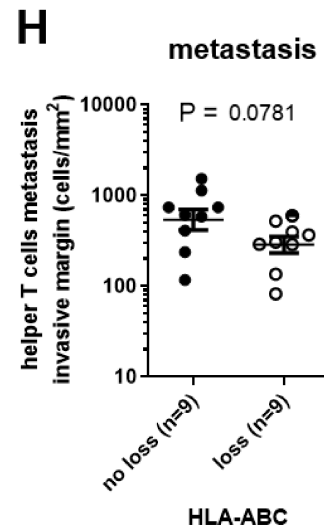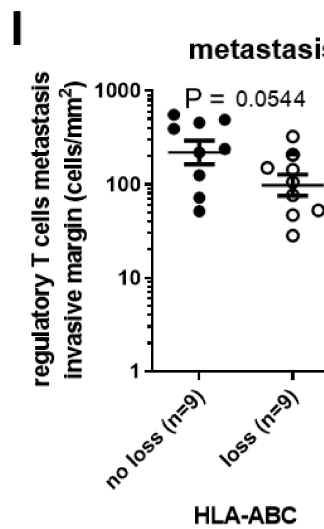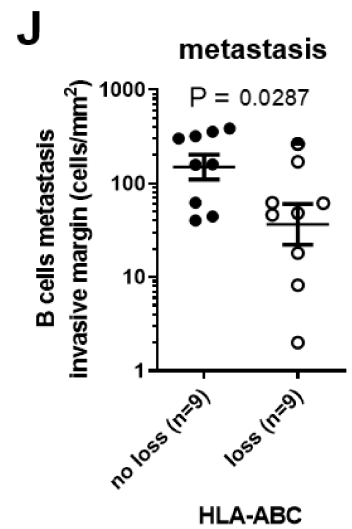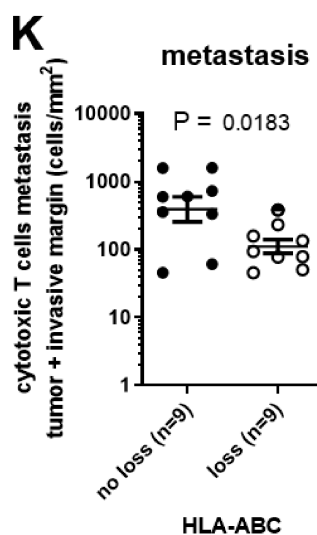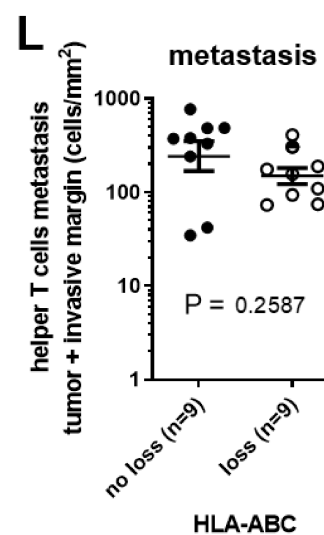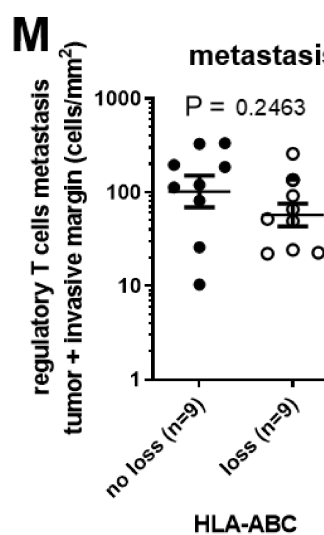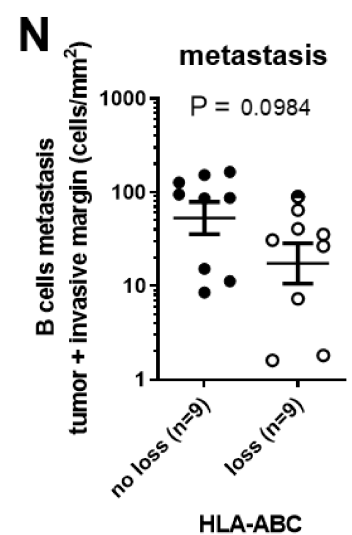

Supplement: jitc-2021-004329supp008_data_supplement.pdf [file jitc-2021-004329supp008_data_supplement.pdf]
