# Supplementary material for: Paired primary and metastatic lesions of patients with ipilimumab-treated melanoma: high variation in lymphocyte infiltration and HLA-ABC expression whereas tumor mutational load is similar and correlates with clinical outcome
Source: PubMed Central journal article supplement (PMC9109111; doi:10.1136/jitc-2021-004329), 2022-05-11

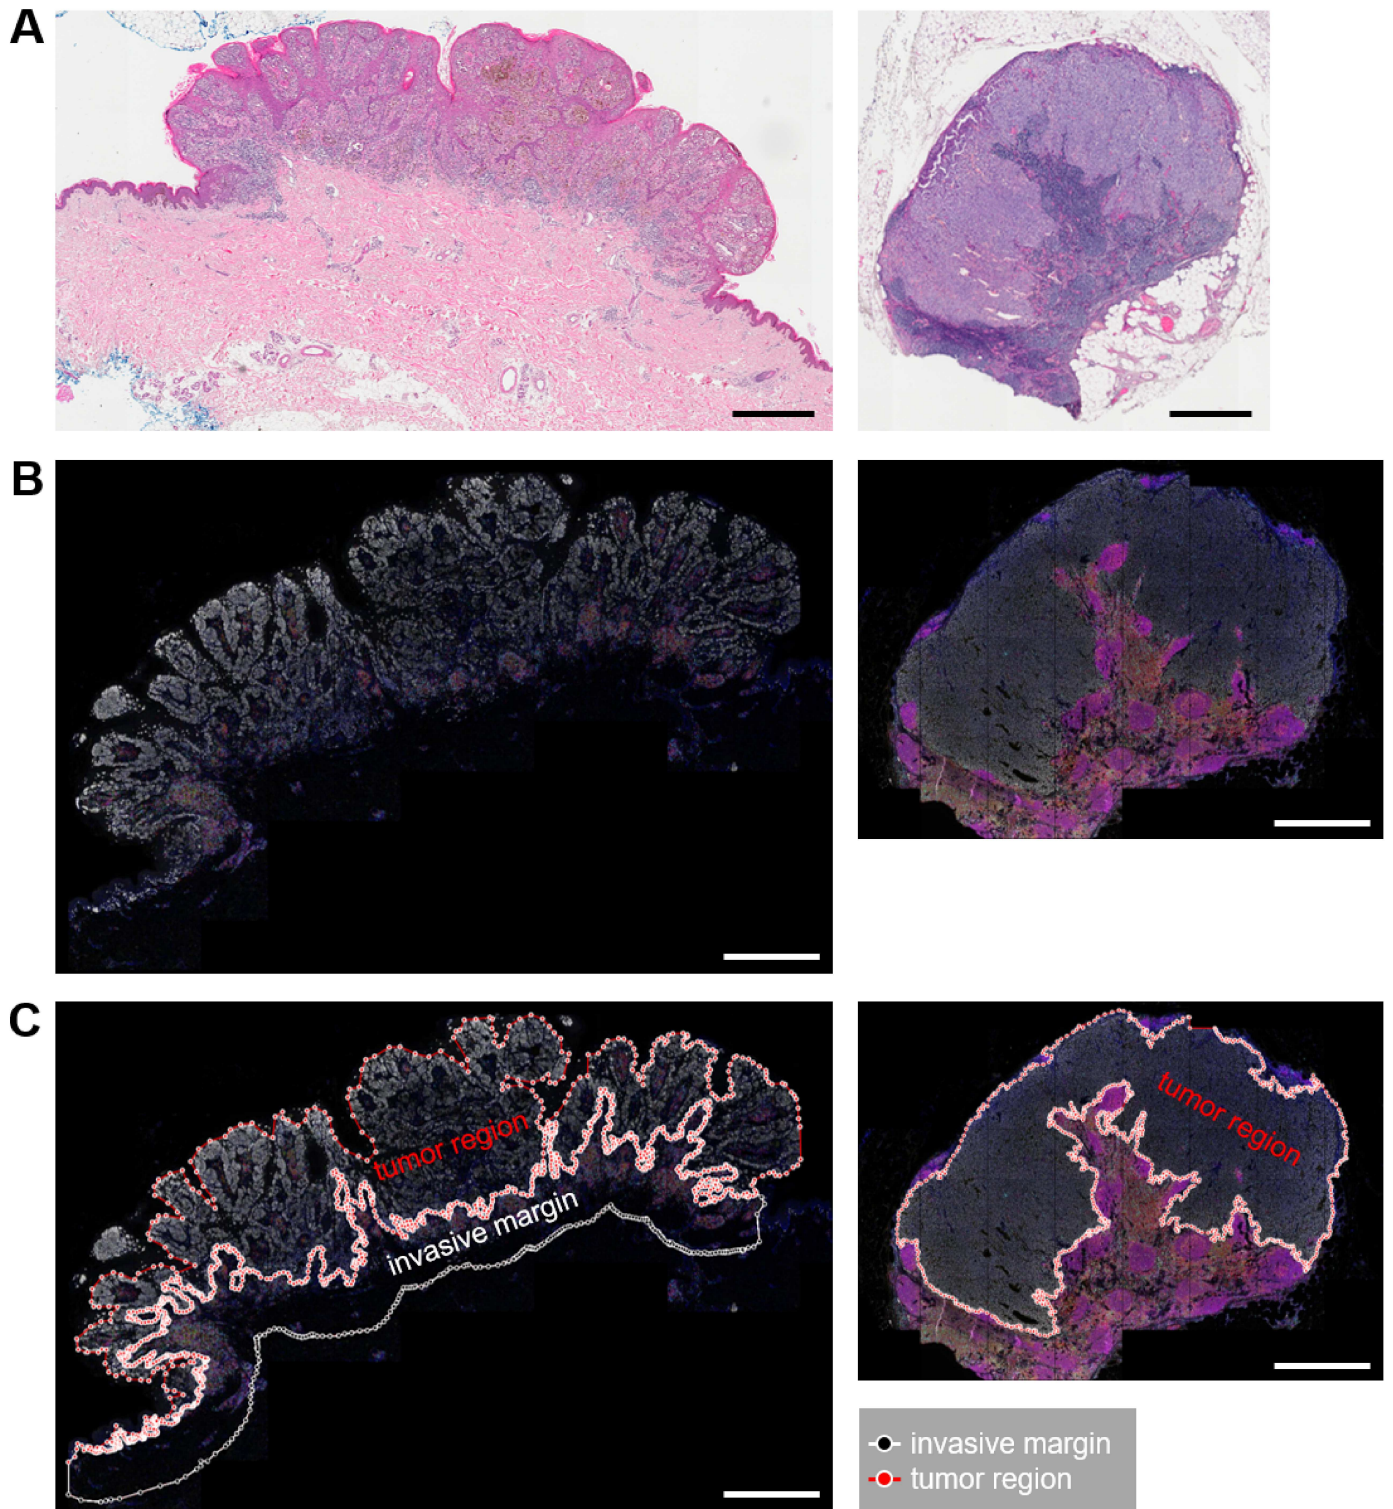

Supplement: jitc-2021-004329supp003.pdf [file jitc-2021-004329supp003.pdf]
