# Supplementary material for: Morfología glaciar en la vertiente meridional de Sierra Nevada (Área Veleta-Mulhacén)
Source: HighWire-hosted journal article supplement (doi:10.1136/jitc-2021-004329), 1987-01-01
Supplement: jitc-2021-004329supp004_data_supplement.pdf [file jitc-2021-004329supp004_data_supplement.pdf]

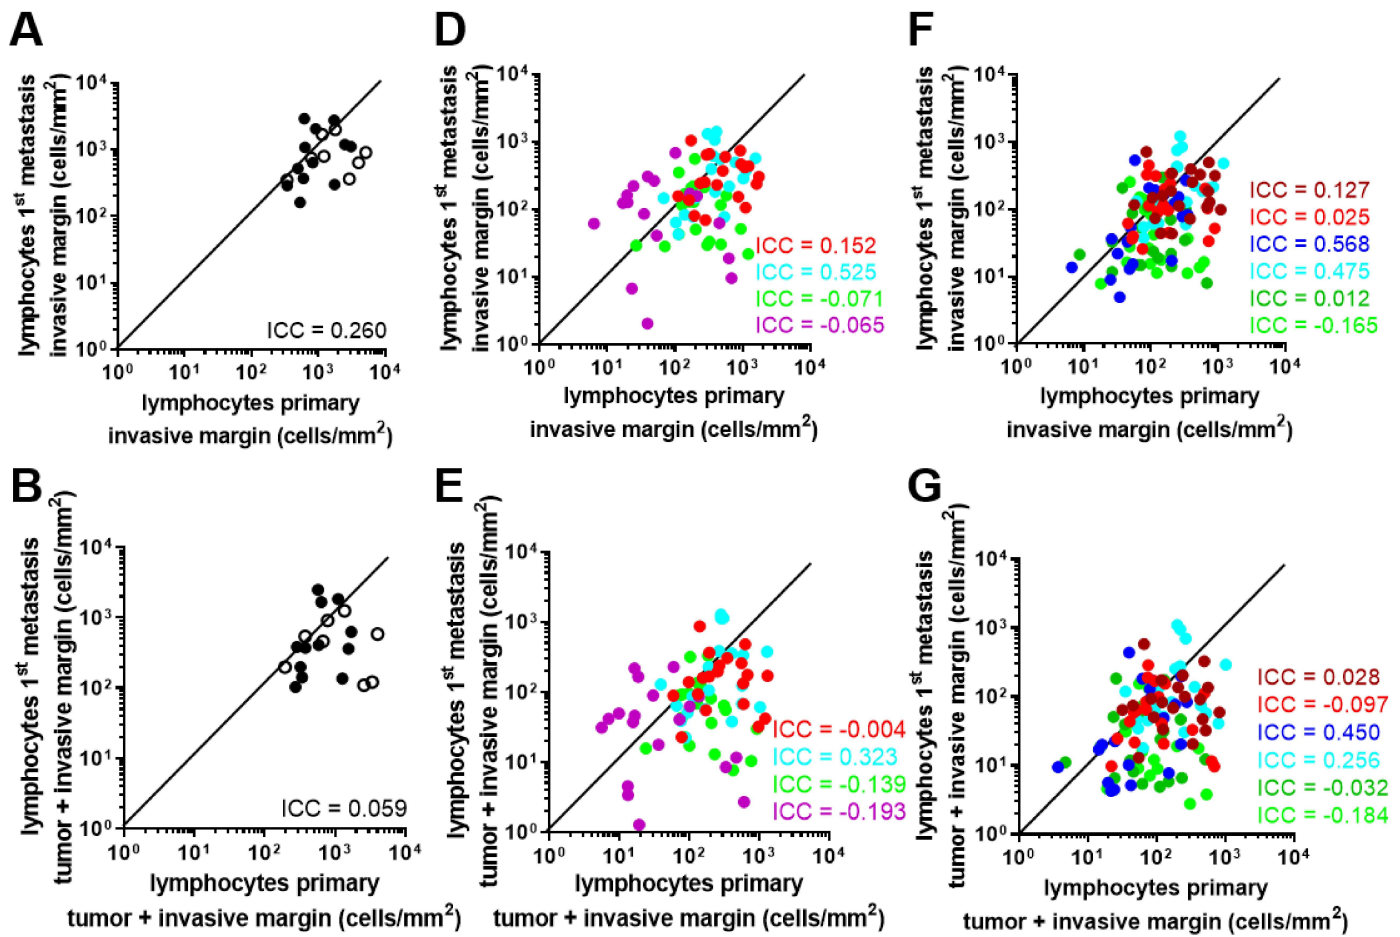

**legend**

- primary vs (sub)cutaneous
- primary vs nodal/visceral
- helper T cells
- cytotoxic T cells
- regulatory T cells
- B cells

**legend**

- helper T cells (CD45RO<sup>+</sup>)
- helper T cells (CD45RO<sup>-</sup>)
- cytotoxic T cells (CD45RO<sup>+</sup>)
- cytotoxic T cells (CD45RO<sup>-</sup>)
- regulatory T cells (CD45RO<sup>+</sup>)
- regulatory T cells (CD45RO<sup>-</sup>)

**legend**

- helper T cells (CD45RO<sup>+</sup>)
- helper T cells (CD45RO<sup>-</sup>)
- cytotoxic T cells (CD45RO<sup>+</sup>)
- cytotoxic T cells (CD45RO<sup>-</sup>)
- regulatory T cells (CD45RO<sup>+</sup>)
- regulatory T cells (CD45RO<sup>-</sup>)

**C** ICC lymphocytes (cells/mm<sup>2</sup>) primary vs 1<sup>st</sup> metastasis invasive margin (+ tumor)

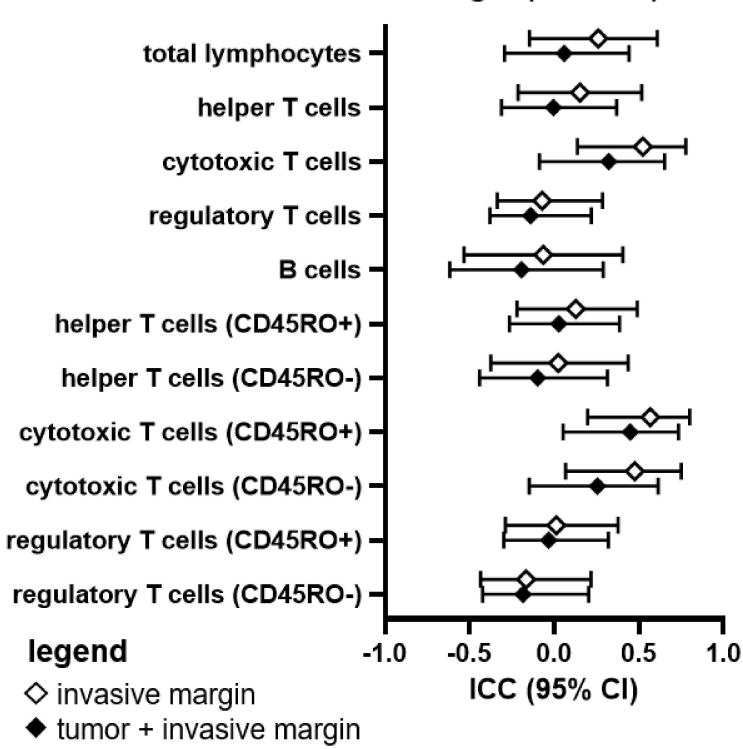

**ICC [95% CI] p-value**

|                                           | ICC [95% CI]            | p-value |
|-------------------------------------------|-------------------------|---------|
| total lymphocytes                         | 0.260 [-0.146 – 0.610]  | 0.109   |
|                                           | 0.059 [-0.292 – 0.442]  | 0.383   |
| helper T cells                            | 0.152 [-0.212 – 0.518]  | 0.219   |
|                                           | -0.004 [-0.310 – 0.369] | 0.509   |
| cytotoxic T cells                         | 0.525 [0.137 – 0.777]   | 0.006   |
|                                           | 0.323 [-0.088 – 0.653]  | 0.064   |
| regulatory T cells                        | -0.071 [-0.336 – 0.286] | 0.672   |
|                                           | -0.139 [-0.380 – 0.220] | 0.846   |
| B cells                                   | -0.065 [-0.533 – 0.406] | 0.602   |
|                                           | -0.193 [-0.616 – 0.289] | 0.783   |
| helper T cells (CD45RO <sup>+</sup> )     | 0.127 [-0.220 – 0.491]  | 0.253   |
|                                           | 0.028 [-0.264 – 0.386]  | 0.436   |
| helper T cells (CD45RO <sup>-</sup> )     | 0.025 [-0.375 – 0.438]  | 0.455   |
|                                           | -0.097 [-0.440 – 0.315] | 0.686   |
| cytotoxic T cells (CD45RO <sup>+</sup> )  | 0.568 [0.197 – 0.801]   | 0.003   |
|                                           | 0.450 [0.052 – 0.734]   | 0.015   |
| cytotoxic T cells (CD45RO <sup>-</sup> )  | 0.475 [0.068 – 0.750]   | 0.014   |
|                                           | 0.256 [-0.147 – 0.615]  | 0.107   |
| regulatory T cells (CD45RO <sup>+</sup> ) | 0.012 [-0.287 – 0.378]  | 0.473   |
|                                           | -0.032 [-0.298 – 0.321] | 0.058   |
| regulatory T cells (CD45RO <sup>-</sup> ) | -0.165 [-0.434 – 0.217] | 0.859   |
|                                           | -0.184 [-0.423 – 0.204] | 0.926   |
