# Supplementary material for: Paired primary and metastatic lesions of patients with ipilimumab-treated melanoma: high variation in lymphocyte infiltration and HLA-ABC expression whereas tumor mutational load is similar and correlates with clinical outcome
Source: PubMed Central journal article supplement (PMC9109111; doi:10.1136/jitc-2021-004329), 2022-05-11
Supplement: jitc-2021-004329supp005.pdf [file jitc-2021-004329supp005.pdf]

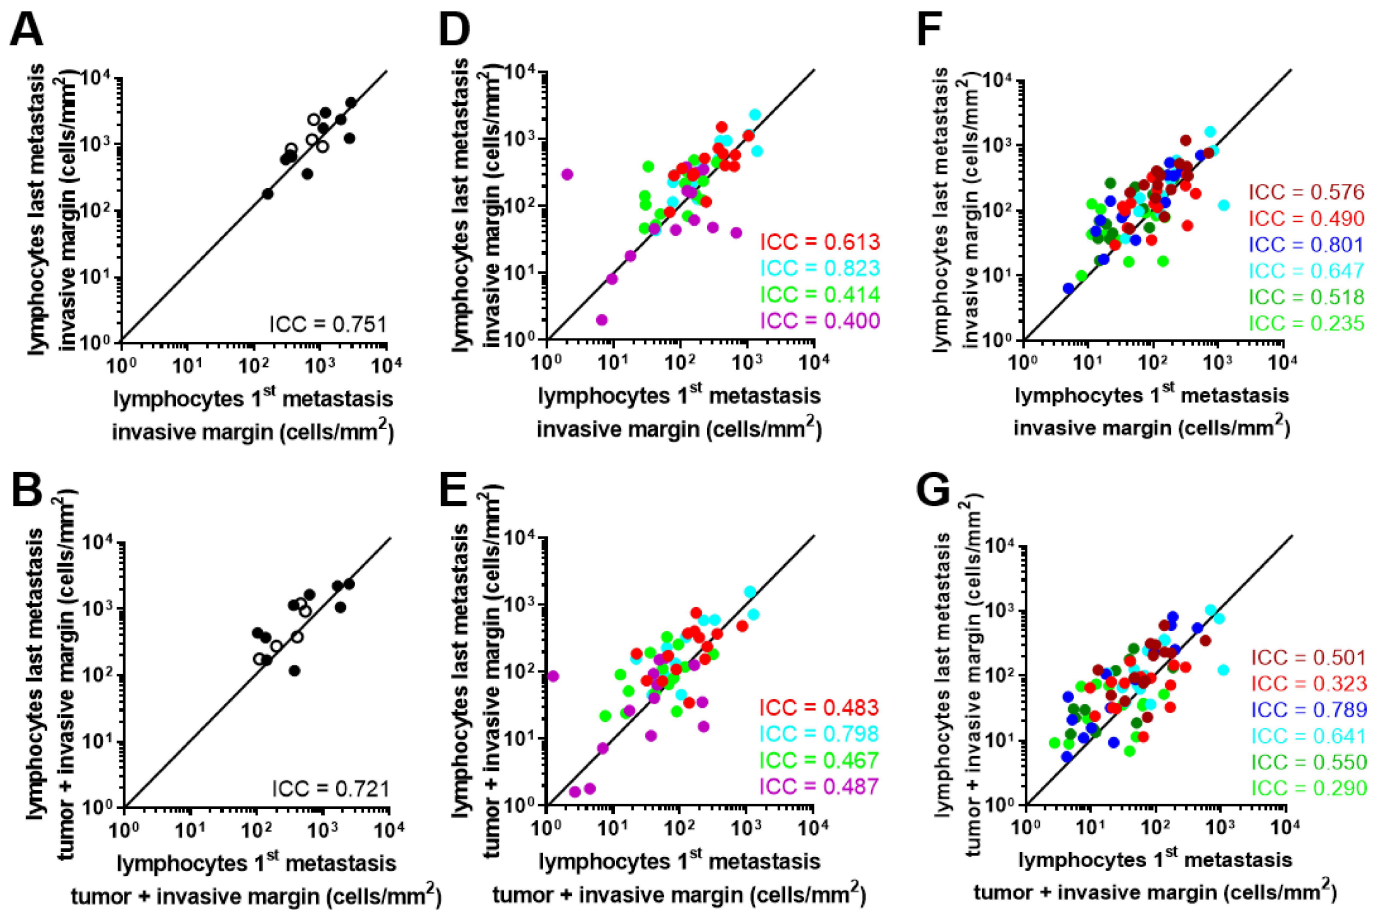

**legend**

- similar metastasis
- dissimilar metastasis

**legend**

- helper T cells
- cytotoxic T cells
- regulatory T cells
- B cells

**legend**

- helper T cells (CD45RO<sup>+</sup>)
- helper T cells (CD45RO<sup>-</sup>)
- cytotoxic T cells (CD45RO<sup>+</sup>)
- cytotoxic T cells (CD45RO<sup>-</sup>)
- regulatory T cells (CD45RO<sup>+</sup>)
- regulatory T cells (CD45RO<sup>-</sup>)

**C** ICC lymphocytes (cells/mm<sup>2</sup>) 1<sup>st</sup> metastasis vs last metastasis invasive margin (+ tumor)

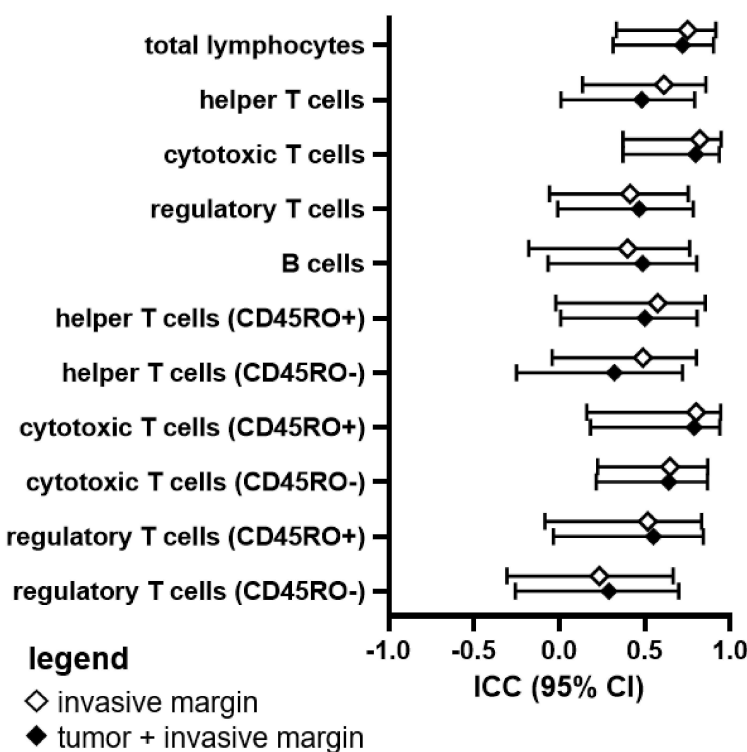

|                   | ICC [95% CI]           | p-value |
|-------------------|------------------------|---------|
| total lymphocytes | 0.751 [0.334 – 0.916]  | 1.73E-4 |
| total lymphocytes | 0.721 [0.314 – 0.902]  | 4.77E-4 |
| total lymphocytes | 0.613 [0.136 – 0.858]  | 0.003   |
| total lymphocytes | 0.483 [0.009 – 0.792]  | 0.024   |
| total lymphocytes | 0.823 [0.373 – 0.947]  | 8.41E-6 |
| total lymphocytes | 0.798 [0.373 – 0.936]  | 3.01E-5 |
| total lymphocytes | 0.414 [-0.058 – 0.755] | 0.028   |
| total lymphocytes | 0.467 [-0.009 – 0.784] | 0.020   |
| total lymphocytes | 0.400 [-0.179 – 0.763] | 0.080   |
| total lymphocytes | 0.487 [-0.065 – 0.804] | 0.039   |
| total lymphocytes | 0.576 [-0.021 – 0.854] | 0.001   |
| total lymphocytes | 0.501 [0.008 – 0.805]  | 0.010   |
| total lymphocytes | 0.490 [-0.042 – 0.803] | 0.036   |
| total lymphocytes | 0.323 [-0.250 – 0.721] | 0.128   |
| total lymphocytes | 0.801 [0.161 – 0.945]  | 4.91E-6 |
| total lymphocytes | 0.789 [0.183 – 0.939]  | 1.1E-5  |
| total lymphocytes | 0.647 [0.224 – 0.869]  | 0.004   |
| total lymphocytes | 0.641 [0.215 – 0.867]  | 0.004   |
| total lymphocytes | 0.518 [-0.084 – 0.833] | 0.002   |
| total lymphocytes | 0.550 [-0.035 – 0.842] | 0.002   |
| total lymphocytes | 0.235 [-0.306 – 0.666] | 0.199   |
| total lymphocytes | 0.290 [-0.257 – 0.699] | 0.148   |
