# Supplementary material for: Paired primary and metastatic lesions of patients with ipilimumab-treated melanoma: high variation in lymphocyte infiltration and HLA-ABC expression whereas tumor mutational load is similar and correlates with clinical outcome
Source: J Immunother Cancer. 2022 May 11;10(5):e004329. doi: 10.1136/jitc-2021-004329 (PMC9109111; doi:10.1136/jitc-2021-004329)
Supplement: Supplementary data [file jitc-2021-004329supp001.xlsx]

## Sheet: Blad1
patient #	tumor type or metastasic site	year	T stage primary	DNA conc (ng/µl)	DIN value	nonsynonymous TMB (nsmut/Mb)	Unstable Sites/MSI (%)	multiplex IHC analysis	HLA-status
1	primary	2012	T2a	NA	NA	NA	NA	tumor + invasive margin	<50
	lymph node	2013	NA	52.8	3.6	ND	ND	tumor only	>50
2	primary	2012	T3b	33.0	3.8	11.787	2.91	tumor + invasive margin	<50
	lymph node	2013	NA	NA	NA	NA	NA	tumor only	no loss
	brain	2014	NA	69.7	4.7	11.001	4.31	tumor only	(partly) dim
3	primary	2008	T2a	7.59	2.9	22.844	1.89	tumor + invasive margin	>50
	skin	2011	NA	9.47	4.3	21.196	2.59	tumor + invasive margin	no loss
	lymph node	2011	NA	31.1	3.5	ND	ND	tumor only	ND
	skin	2011	NA	12.6	3.7	ND	ND	tumor + invasive margin	ND
	skin	2012	NA	22.9	3.2	ND	ND	tumor + invasive margin	no loss
4	primary	2012	T3a	5.96	2.3	14.417	0.00	tumor + invasive margin	>50
	skin	2012	NA	NA	NA	NA	NA	tumor + invasive margin	>50
	lymph node	2012	NA	87.2	2.4	11.99	0.00	tumor only	>50
5	primary	2002	T1a	0.11	ND	ND	ND	tumor + invasive margin	(partly) dim
	skin	2010	NA	11.7	3.4	ND	ND	tumor + invasive margin	>50
	lymph node	2011	NA	6.42	2.0	ND	ND	tumor + invasive margin	>50
6	primary	2009	T3a	16.3	4.0	3.928	0.97	tumor + invasive margin	<50
	skin	2010	NA	12.9	2.6	ND	ND	tumor + invasive margin	no loss
	skin	2011	NA	55.0	2.2	ND	ND	tumor + invasive margin	ND
	skin	2012	NA	9.07	2.4	2.358	2.61	tumor + invasive margin	<50
	skin	2013	NA	NA	NA	NA	NA	tumor + invasive margin	no loss
7	primary	2000	T2a	7.89	1.8#	7.587	ND±	tumor + invasive margin	<50
	skin	2011	NA	38.3	3.0	NA	NA	tumor + invasive margin	>50
	skin	2013	NA	28.7	3.9	6.283	1.87	tumor + invasive margin	>50
8	primary	2001	T3a	1.77	2.7	10.18	2.73	tumor + invasive margin	<50
	skin	2011	NA	15.3	4.8	NA	NA	tumor + invasive margin	no loss
	skin	2013	NA	76.0	3.8	10.97	1.83	tumor + invasive margin	<50
	skin	2013	NA	5.26	2.3	ND	ND	tumor + invasive margin	ND
	skin	2013	NA	34.2	3.1	ND	ND	tumor + invasive margin	(partly) dim
9	primary	2004	T3a	9.38	2.5	7.081	0.00	tumor + invasive margin	>50
	skin	2006	NA	3.35	2.3	ND	ND	tumor + invasive margin	>50
	skin	2009	NA	3.05	3.6	ND	ND	tumor + invasive margin	ND
	skin	2014	NA	17.8	4.9	7.075	1.64	tumor + invasive margin	>50
	skin*	2016	NA	0.27	ND	ND	ND	not analyzed	ND
10	primary	2012	T4b	NA	NA	NA	NA	tumor + invasive margin	no loss
	lymph node	2012	NA	66.6	2.7	ND	ND	tumor only	no loss
11	primary	2008	T1b	NA	NA	NA	NA	tumor + invasive margin	no loss
	DO	2009	NA	NA	NA	NA	NA	tumor + invasive margin	(partly) dim
	DO*	2016	NA	NA	NA	NA	NA	not analyzed	ND
12	primary	2007	T2a	4.42	2.5	ND	ND	tumor + invasive margin	>50
	lymph node	2013	NA	NA	NA	NA	NA	tumor only	ND
	skin	2013	NA	NA	NA	NA	NA	tumor + invasive margin	>50
13	primary	1995	T2a	NA	NA	NA	NA	tumor + invasive margin	no loss
	lymph node	2012	NA	81.2	TBD	ND	ND	tumor only	>50
	lymph node*	2015	NA	NA	NA	NA	NA	not analyzed	ND
14	primary	2012	T2a	2.24	2.3	ND	ND	tumor + invasive margin	>50
	lymph node	2012	NA	NA	NA	NA	NA	tumor only	>50
15	primary	1992	T1b	NA	NA	NA	NA	tumor + invasive margin	>50
	DO	2013	NA	NA	NA	NA	NA	tumor only	<50
16	primary	1998	T3a	35.0	2.7	5.49	0.93	tumor + invasive margin	>50
	skin	2012	NA	30.9	1.8	ND	ND	tumor + invasive margin	>50
	skin	2012	NA	10.8	3.0	4.72	0.00	tumor + invasive margin	>50
17	primary	2008	T3b	NA	NA	NA	NA	tumor + invasive margin	>50
	DO	2014	NA	NA	NA	NA	NA	tumor + invasive margin	no loss
18	primary	2002	T2b	NA	NA	NA	NA	tumor + invasive margin	>50
	lymph node	2008	NA	NA	NA	NA	NA	tumor + invasive margin	>50
	skin	2009	NA	NA	NA	NA	NA	tumor + invasive margin	ND
	skin	2011	NA	NA	NA	NA	NA	tumor + invasive margin	(partly) dim
19	primary	2008	T2a	0.75	ND	NA	NA	tumor + invasive margin	<50
20	primary	2013	T3b	21.3	3.1	8.643	0.98	tumor + invasive margin	<50
	skin	2014	NA	17.2	3.0	14.119	0.93	tumor + invasive margin	no loss
	skin	2014	NA	28.4	3.0	ND	ND	tumor + invasive margin	>50
21	primary	2012	T2a	52.5	4.1	4.7	3.57	tumor + invasive margin	>50
	lymph node	2014	NA	3.56	2.6	5.5	0.85	tumor only	>50
22	primary	2013	T2a	0.801	3.3	3.149	3.80	tumor + invasive margin	>50
	lymph node	2014	NA	35.2	3.2	3.929	3.16	tumor only	<50
	lymph node	2014	NA	36.5	2.6	ND	ND	tumor only	ND
	lymph node	2014	NA	49.2	3.2	ND	ND	tumor only	>50
23	primary	1987	T2x	0.634	1.5	ND	ND	tumor + invasive margin	>50
	DO	2014	NA	0.41	1.8	NA	NA	tumor only	ND
	skin*	2016	NA	18.8	2.9	ND	ND	ND	ND
24	primary	1997	T2x	9.15	2.6	7.07	4.20	tumor + invasive margin	<50
	skin	2013	NA	12.1	2.6	ND	ND	tumor + invasive margin	no loss
	skin	2015	NA	84.7	3.3	8.63	2.54	tumor + invasive margin	no loss
25	primary	2002	T1b	8.86	2.3	ND$	ND$	tumor + invasive margin	>50
	lymph node	2015	NA	17	4.0	7.075	0.00	tumor only	no loss
	DO	2015	NA	31.3	2.2	ND	ND	tumor + invasive margin	>50
26	primary	2007	T2a	2.18	2.5	9.613	ND±	tumor + invasive margin	<50
	DO	2015	NA	25.9	3.4	6.27	5.22	tumor + invasive margin	<50
27	primary	2014	T2b	27.4	3.2	6.27	4.12	tumor + invasive margin	no loss
	skin	2015	NA	40.5	3.4	6.278	2.80	tumor + invasive margin	(partly) dim
	skin	2015	NA	0.205	ND	ND	ND	tumor + invasive margin	(partly) dim
28	primary	2005	T1a	2.73	2.4	ND	ND	tumor + invasive margin	>50
29	primary	2003	T2a	7.8	2.9	11.847	1.32	tumor + invasive margin	>50
	DO*	2013	NA	3.61	2.2	ND	ND	ND	ND
30	primary	2012	T2a	14.7	3.2	11.016	3.23	tumor + invasive margin	<50
	DO	2013	NA	5.32	2.3	ND	ND	tumor + invasive margin	>50
	skin	2014	NA	1.31	2.7	ND	ND	tumor + invasive margin	ND
	skin	2014	NA	2.78	2.5	11.792	3.60	tumor + invasive margin	>50
	skin	2014	NA	0.45	ND	ND	ND	tumor + invasive margin	>50
	skin*	2017	NA	5.77	3.3	ND	ND	ND	ND
31	primary	2014	T4a	59.9	4.0	49.516	3.12	tumor + invasive margin	(partly) dim
	lymph node	2015	NA	45.2	3.7	ND	ND	ND	ND
	skin	2015	NA	88.5	5.9	46.262	1.79	tumor + invasive margin	(partly) dim
	skin	2015	NA	7.15	2.6	ND	ND	tumor + invasive margin	no loss
	skin	2015	NA	44.1	5.2	ND	ND	tumor + invasive margin	(partly) dim
	skin	2015	NA	15.9	2.9	ND	ND	tumor + invasive margin	ND
32	primary	2007	T2a	5.1	2.8	7.064	2.15	tumor + invasive margin	>50
	lymph node	2014	NA	43.3	3.1	ND	ND	tumor + invasive margin	<50
	DO	2014	NA	54.9	4.0	3.94	1.09	tumor + invasive margin	>50
	DO	2014	NA	56.7	4.0	ND	ND	tumor + invasive margin	ND
	DO	2014	NA	71.8	3.7	ND	ND	tumor only	>50
* after IPI
# demo sample (TSO500 quality was considered sufficient to interpret the data)
± not enough usable MSI sites
$ excluded, tumor percentage was too low
DO = distant organ
DIN = DNA integrity number; samples with DIN ≥2.3 passed quality assessment and could be proceeded with
NA = not available (DNA not isolated)
ND = not determined
