# Supplementary material for: Paired primary and metastatic lesions of patients with ipilimumab-treated melanoma: high variation in lymphocyte infiltration and HLA-ABC expression whereas tumor mutational load is similar and correlates with clinical outcome
Source: J Immunother Cancer. 2022 May 11;10(5):e004329. doi: 10.1136/jitc-2021-004329 (PMC9109111; doi:10.1136/jitc-2021-004329)
Supplement: Supplementary data [file jitc-2021-004329supp002.xlsx]

## Sheet: Blad1
difference between primary and meta (years)	Patient number	BAP1 (NM_004656.3)	BRAF (NM_004333.4)	CTNNB1 (NM_001904.3)	APC (NM_000038.5)	AXIN1 (NM_003502.4)	EIF1AX (NM_001412.4)	GNA11 (NM_002067.4)	GNAQ (NM_002072.4)	HRAS (NM_005343.3)	KIT (NM_000222.2)	NF1 (NM_001042492.2)	NRAS (NM_002524.4)	RAC1 (NM_018890.3)	SF3B1 (NM_012433.3)	TERT promoter (NM_198253.2)	TP53 (NM_000546.5)	TP53	PTEN (NM_000314.7)	B2M (NM_004048.3)
2	2		BRAF c.1799_1800delinsAA (p.(Val600Glu))													TERT c.-124C>T	TP53 c.843_844delinsTT (p.(Arg282Trp))		PTEN c.165-14_175delinsCCAA (p.?)
3	3			CTNNB1 c.133T>G (p.(Ser45Ala)) (only in 5% of primary)												TERT c.-146C>T	TP53 c.97-1G>A (p.(?))
0	4		BRAF c.1799T>A (p.(Val600Glu))													TERT c.-146C>T	TP53 c.764T>G (p.(Ile255Ser))
3	6		BRAF c.1799T>A (p.(Val600Glu))													TERT c.-124C>T
13	7		BRAF c.1799T>A (p.(Val600Glu))													TERT c.-146C>T	TP53 c.817C>T (p.(Arg273Cys))	TP53 c.586C>T (p.(Arg196*)) (only in 4% of primary)	PTEN c.283C>T (p.(Pro95Ser))
12	8		BRAF c.1799T>A (p.(Val600Glu))													TERT c.-124C>T
9	9		BRAF c.1798_1799delinsAA (p.(Val600Lys))													TERT c.-124C>T
14	16		BRAF c.1799T>A (p.(Val600Glu))
1	20		BRAF c.1798_1799delinsAA (p.(Val600Lys))													TERT c.-146C>T	TP53 c.948_949delinsTT (p.Gln317*)	TP53 c.856G>A (p.(Glu286Lys)
2	21		BRAF c.1798_1799delinsAA (p.(Val600Lys))
1	22		BRAF c.1799T>A (p.(Val600Glu))													TERT c.-124C>T
18	24												NRAS c.182A>G (p.(Gln61Arg))			TERT c.-124C>T
13	25		BRAF c.1799T>A (p.(Val600Glu))													TERT c.-146C>T (only in 1% of primary)
8	26		BRAF c.1799T>A (p.(Val600Glu))													TERT c.-146C>T
1	27												NRAS c.182A>G (p.(Gln61Arg))			TERT c.-146C>T			PTEN c.331T>C (p.(Trp111Arg))
2	30		BRAF c.1798_1799delinsAG (p.(Val600Arg))													TERT c.-146C>T
1	31		BRAF c.1798_1799delinsAA (p.(Val600Lys))		APC c.6709C>T (p.(Arg2237*))		EIF1AX c.44G>A (p.(Gly15Asp))									TERT c.-146C>T
7	32												NRAS c.181C>A (p.(Gln61Lys))			TERT c.-146C>T	TP53 c.643A>C (p.(Ser215Arg))
	in primair and meta
	only in meta
	only in primair
